# Supplementary material
Source: PubMed Central journal article supplement (PMC3586542)
Supplement: NIHMS434267-supplement-1_si_001.pdf [file NIHMS434267-supplement-1_si_001.pdf]

*Supporting Information for*

**Multidimensional MAS NMR Spectroscopy for Site-Resolved Measurement of  
Proton Chemical Shift Anisotropy in Biological Solids**

Guangjin Hou<sup>1,2,§</sup>, Sivakumar Paramasivam<sup>1,§</sup>, Si Yan<sup>1</sup>, Tatyana Polenova<sup>1,2,\*</sup>, and Alexander J. Vega<sup>1,\*</sup>

<sup>1</sup>*Department of Chemistry and Biochemistry, University of Delaware, Newark, DE 19716;*

<sup>2</sup>*Pittsburgh Center for HIV Protein Interactions, University of Pittsburgh School of Medicine, Pittsburgh, PA 15261, United States*

**AUTHOR EMAIL ADDRESS:** hou@udel.edu, siva@udel.edu, syan@udel.edu, tpolenov@udel.edu, lexvega@comcast.net

§ These authors contributed equally to this publication.

---

\*Corresponding authors: Alexander J. Vega, University of Delaware, Department of Chemistry and Biochemistry, email: lexvega@comcast.net; Phone (302) 831-8624; Tatyana Polenova, University of Delaware, Department of Chemistry and Biochemistry; email: tpolenov@udel.edu; Phone (302) 831-1968;

## MULTI-PROTON SPECTRA

For the simulation of  $R12_1^4$  spectra including the effect of extra nearby protons we chose the coordinates of the  $C_\alpha H$  proton and one of the  $C_\beta H_2$  protons determined by Rienstra et al. for the Leu residue in *f*-MLF-OH (with the exception that we took 1.054 Å for the NH distance instead of the reported 0.98 Å in order to reproduce the DCC of 10.4 kHz used in the other simulations).<sup>1</sup> In addition, we added the  $C_\alpha H(i - 1)$  proton of the preceding Met amino acid with modified torsion angles such that it reflects the characteristic backbone structure in a  $\beta$ -sheet, which has this proton at a particularly short distance from the amide group under consideration. The molecular structure was transformed to a coordinate system with its  $z$  axis along NH and its  $y$  axis in the peptide plane, leading to the atomic coordinates listed in Table S1. In addition to the polar angles  $\theta$ ,  $\phi$  defining the NH direction in the CSA frame of the amide proton, a third Euler angle for the orientation of the peptide plane with respect to the CSA needed to be specified. We chose the Euler angles such that the CSA tensor orientation had its  $Y$  axis parallel to the molecular  $y$  axis and its  $Z$  axis making a small angle  $\theta$  with the NH bond, in close agreement with the conventional model depicted in Fig. 1(a). CSA tensor components that are typical for aliphatic protons<sup>2</sup> were assigned to the three extra protons, i. e., axially symmetric tensors with  $\delta_{zz} - \delta_{iso} = 6$  ppm aligned parallel to their CH vectors. We also performed simulations including the two  $H\beta$  protons with no significant effects on the spectra (not shown).

**Table S1.** Atomic coordinates (in Å) in a peptide structure and their distances  $d$  to the amide H and N atoms based on results reported by Rienstra et al.<sup>3</sup> and used for the simulation of the multinuclear  $R12_1^4$  spectra shown in Figure 3.

|                        | $x$    | $y$    | $z$    | $d_H$ | $d_N$ |
|------------------------|--------|--------|--------|-------|-------|
| H                      | 0.000  | 0.000  | 1.045  | 0     | 1.045 |
| N                      | 0.000  | 0.000  | 0.000  | 1.045 | 0     |
| H $\alpha$             | 0.371  | -1.136 | -1.688 | 2.991 | 2.068 |
| H $\beta$              | 0.280  | -2.488 | 1.018  | 2.504 | 2.703 |
| H $\alpha$ ( $i - 1$ ) | -0.101 | -2.087 | 1.293  | 2.103 | 2.457 |

**Table S2.** Spin-interaction parameters used for the simulation of the four-proton spectra shown in Figure 3 and the parameters obtained by triple curve fitting using full Hamiltonian  $^1\text{H}^{15}\text{N}$  Hamiltonian or average Hamiltonian. The atomic coordinates of N and H atoms are given in Table S1.

|                           | $\delta_{XX} - \delta_{iso}$ | $\delta_{YY} - \delta_{iso}$ | $\delta_{ZZ} - \delta_{iso}$ | span | DCC  | $\theta$ |
|---------------------------|------------------------------|------------------------------|------------------------------|------|------|----------|
| NH <sub>4</sub> simulated | 5.5                          | -1.5                         | -4.0                         | 9.5  | 10.0 | 10°      |
| full NH Hamilt. fit       | 6.1                          | -1.7                         | -4.4                         | 10.4 | 10.1 | 18°      |
| average Hamilt. fit       | 6.1                          | -2.0                         | -4.1                         | 10.3 | 10.0 | 13°      |
| NH <sub>4</sub> simulated | 5.0                          | 1.0                          | -6.0                         | 11.0 | 10.0 | 10°      |
| full NH Hamilt. fit       | 6.0                          | -0.1                         | -5.9                         | 11.9 | 9.8  | 9°       |
| average Hamilt. fit       | 6.2                          | 0.0                          | -6.2                         | 12.4 | 10.0 | 9°       |
| NH <sub>4</sub> simulated | 8.0                          | -1.0                         | -7.0                         | 15.0 | 10.0 | 5°       |
| full NH Hamilt. fit       | 8.3                          | -1.4                         | -6.9                         | 15.2 | 9.7  | 5°       |
| average Hamilt. fit       | 8.5                          | -1.4                         | -7.1                         | 15.5 | 9.9  | 0°       |
| NH <sub>4</sub> simulated | 8.0                          | -1.0                         | -7.0                         | 15.0 | 10.0 | 20°      |
| full NH Hamilt. fit       | 8.3                          | -1.4                         | -6.9                         | 15.1 | 9.7  | 21°      |
| average Hamilt. fit       | 8.5                          | -1.6                         | -6.9                         | 15.3 | 10.0 | 20°      |
| NH <sub>4</sub> simulated | 8.0                          | 2.0                          | -10.0                        | 18.0 | 10.0 | 5°       |
| full NH Hamilt. fit       | 8.4                          | 1.8                          | -10.2                        | 18.6 | 9.6  | 6°       |
| average Hamilt. fit       | 8.4                          | 2.3                          | -10.7                        | 19.2 | 9.9  | 7°       |
| NH <sub>4</sub> simulated | 8.0                          | 2.0                          | -10.0                        | 18.0 | 10.0 | 20°      |
| full NH Hamilt. fit       | 7.8                          | 2.4                          | -10.2                        | 18.1 | 9.6  | 22°      |
| average Hamilt. fit       | 7.7                          | 2.7                          | -10.4                        | 18.0 | 9.9  | 21°      |

**Table S3.** Summary of the first- and second-order terms present in the Hamiltonians of four RN-symmetry sequences suitable for recoupling of  $^1\text{H}$  chemical shift anisotropy.

| Sequence                      | First-order terms                                                                                                                                                                                         | Second-order terms |       |       |    |   |   |   |   |   |   |                                                                                                                                                                                                                                                                                                                                                                                                                                                                                                                                                                    |  |    |     |       |    |   |    |    |    |    |   |   |     |    |    |   |   |    |       |    |   |   |   |   |    |   |   |   |   |   |   |   |    |   |   |   |
|-------------------------------|-----------------------------------------------------------------------------------------------------------------------------------------------------------------------------------------------------------|--------------------|-------|-------|----|---|---|---|---|---|---|--------------------------------------------------------------------------------------------------------------------------------------------------------------------------------------------------------------------------------------------------------------------------------------------------------------------------------------------------------------------------------------------------------------------------------------------------------------------------------------------------------------------------------------------------------------------|--|----|-----|-------|----|---|----|----|----|----|---|---|-----|----|----|---|---|----|-------|----|---|---|---|---|----|---|---|---|---|---|---|---|----|---|---|---|
| R18 <sub>2</sub> <sup>5</sup> | <table border="1"> <thead> <tr> <th>DD</th> <th>CSA</th> <th>isoCS</th> <th>rf</th> <th>J</th> </tr> </thead> <tbody> <tr> <td>0</td> <td>2</td> <td>0</td> <td>0</td> <td>1</td> </tr> </tbody> </table> | DD                 | CSA   | isoCS | rf | J | 0 | 2 | 0 | 0 | 1 | <table border="1"> <thead> <tr> <th></th> <th>DD</th> <th>CSA</th> <th>isoCS</th> <th>rf</th> <th>J</th> </tr> </thead> <tbody> <tr> <th>DD</th> <td>16</td> <td>38</td> <td>6</td> <td>0</td> <td>0</td> </tr> <tr> <th>CSA</th> <td>38</td> <td>36</td> <td>4</td> <td>4</td> <td>12</td> </tr> <tr> <th>isoCS</th> <td>6</td> <td>4</td> <td>2</td> <td>0</td> <td>3</td> </tr> <tr> <th>rf</th> <td>0</td> <td>4</td> <td>0</td> <td>2</td> <td>2</td> </tr> <tr> <th>J</th> <td>0</td> <td>12</td> <td>3</td> <td>2</td> <td>0</td> </tr> </tbody> </table>   |  | DD | CSA | isoCS | rf | J | DD | 16 | 38 | 6  | 0 | 0 | CSA | 38 | 36 | 4 | 4 | 12 | isoCS | 6  | 4 | 2 | 0 | 3 | rf | 0 | 4 | 0 | 2 | 2 | J | 0 | 12 | 3 | 2 | 0 |
|                               | DD                                                                                                                                                                                                        | CSA                | isoCS | rf    | J  |   |   |   |   |   |   |                                                                                                                                                                                                                                                                                                                                                                                                                                                                                                                                                                    |  |    |     |       |    |   |    |    |    |    |   |   |     |    |    |   |   |    |       |    |   |   |   |   |    |   |   |   |   |   |   |   |    |   |   |   |
| 0                             | 2                                                                                                                                                                                                         | 0                  | 0     | 1     |    |   |   |   |   |   |   |                                                                                                                                                                                                                                                                                                                                                                                                                                                                                                                                                                    |  |    |     |       |    |   |    |    |    |    |   |   |     |    |    |   |   |    |       |    |   |   |   |   |    |   |   |   |   |   |   |   |    |   |   |   |
|                               | DD                                                                                                                                                                                                        | CSA                | isoCS | rf    | J  |   |   |   |   |   |   |                                                                                                                                                                                                                                                                                                                                                                                                                                                                                                                                                                    |  |    |     |       |    |   |    |    |    |    |   |   |     |    |    |   |   |    |       |    |   |   |   |   |    |   |   |   |   |   |   |   |    |   |   |   |
| DD                            | 16                                                                                                                                                                                                        | 38                 | 6     | 0     | 0  |   |   |   |   |   |   |                                                                                                                                                                                                                                                                                                                                                                                                                                                                                                                                                                    |  |    |     |       |    |   |    |    |    |    |   |   |     |    |    |   |   |    |       |    |   |   |   |   |    |   |   |   |   |   |   |   |    |   |   |   |
| CSA                           | 38                                                                                                                                                                                                        | 36                 | 4     | 4     | 12 |   |   |   |   |   |   |                                                                                                                                                                                                                                                                                                                                                                                                                                                                                                                                                                    |  |    |     |       |    |   |    |    |    |    |   |   |     |    |    |   |   |    |       |    |   |   |   |   |    |   |   |   |   |   |   |   |    |   |   |   |
| isoCS                         | 6                                                                                                                                                                                                         | 4                  | 2     | 0     | 3  |   |   |   |   |   |   |                                                                                                                                                                                                                                                                                                                                                                                                                                                                                                                                                                    |  |    |     |       |    |   |    |    |    |    |   |   |     |    |    |   |   |    |       |    |   |   |   |   |    |   |   |   |   |   |   |   |    |   |   |   |
| rf                            | 0                                                                                                                                                                                                         | 4                  | 0     | 2     | 2  |   |   |   |   |   |   |                                                                                                                                                                                                                                                                                                                                                                                                                                                                                                                                                                    |  |    |     |       |    |   |    |    |    |    |   |   |     |    |    |   |   |    |       |    |   |   |   |   |    |   |   |   |   |   |   |   |    |   |   |   |
| J                             | 0                                                                                                                                                                                                         | 12                 | 3     | 2     | 0  |   |   |   |   |   |   |                                                                                                                                                                                                                                                                                                                                                                                                                                                                                                                                                                    |  |    |     |       |    |   |    |    |    |    |   |   |     |    |    |   |   |    |       |    |   |   |   |   |    |   |   |   |   |   |   |   |    |   |   |   |
| R18 <sub>1</sub> <sup>7</sup> | <table border="1"> <thead> <tr> <th>DD</th> <th>CSA</th> <th>isoCS</th> <th>rf</th> <th>J</th> </tr> </thead> <tbody> <tr> <td>0</td> <td>2</td> <td>0</td> <td>0</td> <td>1</td> </tr> </tbody> </table> | DD                 | CSA   | isoCS | rf | J | 0 | 2 | 0 | 0 | 1 | <table border="1"> <thead> <tr> <th></th> <th>DD</th> <th>CSA</th> <th>isoCS</th> <th>rf</th> <th>J</th> </tr> </thead> <tbody> <tr> <th>DD</th> <td>16</td> <td>38</td> <td>6</td> <td>0</td> <td>0</td> </tr> <tr> <th>CSA</th> <td>38</td> <td>36</td> <td>4</td> <td>4</td> <td>12</td> </tr> <tr> <th>isoCS</th> <td>6</td> <td>4</td> <td>2</td> <td>0</td> <td>3</td> </tr> <tr> <th>rf</th> <td>0</td> <td>4</td> <td>0</td> <td>2</td> <td>2</td> </tr> <tr> <th>J</th> <td>0</td> <td>12</td> <td>3</td> <td>2</td> <td>0</td> </tr> </tbody> </table>   |  | DD | CSA | isoCS | rf | J | DD | 16 | 38 | 6  | 0 | 0 | CSA | 38 | 36 | 4 | 4 | 12 | isoCS | 6  | 4 | 2 | 0 | 3 | rf | 0 | 4 | 0 | 2 | 2 | J | 0 | 12 | 3 | 2 | 0 |
|                               | DD                                                                                                                                                                                                        | CSA                | isoCS | rf    | J  |   |   |   |   |   |   |                                                                                                                                                                                                                                                                                                                                                                                                                                                                                                                                                                    |  |    |     |       |    |   |    |    |    |    |   |   |     |    |    |   |   |    |       |    |   |   |   |   |    |   |   |   |   |   |   |   |    |   |   |   |
| 0                             | 2                                                                                                                                                                                                         | 0                  | 0     | 1     |    |   |   |   |   |   |   |                                                                                                                                                                                                                                                                                                                                                                                                                                                                                                                                                                    |  |    |     |       |    |   |    |    |    |    |   |   |     |    |    |   |   |    |       |    |   |   |   |   |    |   |   |   |   |   |   |   |    |   |   |   |
|                               | DD                                                                                                                                                                                                        | CSA                | isoCS | rf    | J  |   |   |   |   |   |   |                                                                                                                                                                                                                                                                                                                                                                                                                                                                                                                                                                    |  |    |     |       |    |   |    |    |    |    |   |   |     |    |    |   |   |    |       |    |   |   |   |   |    |   |   |   |   |   |   |   |    |   |   |   |
| DD                            | 16                                                                                                                                                                                                        | 38                 | 6     | 0     | 0  |   |   |   |   |   |   |                                                                                                                                                                                                                                                                                                                                                                                                                                                                                                                                                                    |  |    |     |       |    |   |    |    |    |    |   |   |     |    |    |   |   |    |       |    |   |   |   |   |    |   |   |   |   |   |   |   |    |   |   |   |
| CSA                           | 38                                                                                                                                                                                                        | 36                 | 4     | 4     | 12 |   |   |   |   |   |   |                                                                                                                                                                                                                                                                                                                                                                                                                                                                                                                                                                    |  |    |     |       |    |   |    |    |    |    |   |   |     |    |    |   |   |    |       |    |   |   |   |   |    |   |   |   |   |   |   |   |    |   |   |   |
| isoCS                         | 6                                                                                                                                                                                                         | 4                  | 2     | 0     | 3  |   |   |   |   |   |   |                                                                                                                                                                                                                                                                                                                                                                                                                                                                                                                                                                    |  |    |     |       |    |   |    |    |    |    |   |   |     |    |    |   |   |    |       |    |   |   |   |   |    |   |   |   |   |   |   |   |    |   |   |   |
| rf                            | 0                                                                                                                                                                                                         | 4                  | 0     | 2     | 2  |   |   |   |   |   |   |                                                                                                                                                                                                                                                                                                                                                                                                                                                                                                                                                                    |  |    |     |       |    |   |    |    |    |    |   |   |     |    |    |   |   |    |       |    |   |   |   |   |    |   |   |   |   |   |   |   |    |   |   |   |
| J                             | 0                                                                                                                                                                                                         | 12                 | 3     | 2     | 0  |   |   |   |   |   |   |                                                                                                                                                                                                                                                                                                                                                                                                                                                                                                                                                                    |  |    |     |       |    |   |    |    |    |    |   |   |     |    |    |   |   |    |       |    |   |   |   |   |    |   |   |   |   |   |   |   |    |   |   |   |
| R12 <sub>1</sub> <sup>4</sup> | <table border="1"> <thead> <tr> <th>DD</th> <th>CSA</th> <th>isoCS</th> <th>rf</th> <th>J</th> </tr> </thead> <tbody> <tr> <td>0</td> <td>2</td> <td>0</td> <td>0</td> <td>1</td> </tr> </tbody> </table> | DD                 | CSA   | isoCS | rf | J | 0 | 2 | 0 | 0 | 1 | <table border="1"> <thead> <tr> <th></th> <th>DD</th> <th>CSA</th> <th>isoCS</th> <th>rf</th> <th>J</th> </tr> </thead> <tbody> <tr> <th>DD</th> <td>24</td> <td>42</td> <td>10</td> <td>0</td> <td>0</td> </tr> <tr> <th>CSA</th> <td>42</td> <td>40</td> <td>4</td> <td>4</td> <td>12</td> </tr> <tr> <th>isoCS</th> <td>10</td> <td>4</td> <td>2</td> <td>0</td> <td>3</td> </tr> <tr> <th>rf</th> <td>0</td> <td>4</td> <td>0</td> <td>2</td> <td>2</td> </tr> <tr> <th>J</th> <td>0</td> <td>12</td> <td>3</td> <td>2</td> <td>0</td> </tr> </tbody> </table> |  | DD | CSA | isoCS | rf | J | DD | 24 | 42 | 10 | 0 | 0 | CSA | 42 | 40 | 4 | 4 | 12 | isoCS | 10 | 4 | 2 | 0 | 3 | rf | 0 | 4 | 0 | 2 | 2 | J | 0 | 12 | 3 | 2 | 0 |
|                               | DD                                                                                                                                                                                                        | CSA                | isoCS | rf    | J  |   |   |   |   |   |   |                                                                                                                                                                                                                                                                                                                                                                                                                                                                                                                                                                    |  |    |     |       |    |   |    |    |    |    |   |   |     |    |    |   |   |    |       |    |   |   |   |   |    |   |   |   |   |   |   |   |    |   |   |   |
| 0                             | 2                                                                                                                                                                                                         | 0                  | 0     | 1     |    |   |   |   |   |   |   |                                                                                                                                                                                                                                                                                                                                                                                                                                                                                                                                                                    |  |    |     |       |    |   |    |    |    |    |   |   |     |    |    |   |   |    |       |    |   |   |   |   |    |   |   |   |   |   |   |   |    |   |   |   |
|                               | DD                                                                                                                                                                                                        | CSA                | isoCS | rf    | J  |   |   |   |   |   |   |                                                                                                                                                                                                                                                                                                                                                                                                                                                                                                                                                                    |  |    |     |       |    |   |    |    |    |    |   |   |     |    |    |   |   |    |       |    |   |   |   |   |    |   |   |   |   |   |   |   |    |   |   |   |
| DD                            | 24                                                                                                                                                                                                        | 42                 | 10    | 0     | 0  |   |   |   |   |   |   |                                                                                                                                                                                                                                                                                                                                                                                                                                                                                                                                                                    |  |    |     |       |    |   |    |    |    |    |   |   |     |    |    |   |   |    |       |    |   |   |   |   |    |   |   |   |   |   |   |   |    |   |   |   |
| CSA                           | 42                                                                                                                                                                                                        | 40                 | 4     | 4     | 12 |   |   |   |   |   |   |                                                                                                                                                                                                                                                                                                                                                                                                                                                                                                                                                                    |  |    |     |       |    |   |    |    |    |    |   |   |     |    |    |   |   |    |       |    |   |   |   |   |    |   |   |   |   |   |   |   |    |   |   |   |
| isoCS                         | 10                                                                                                                                                                                                        | 4                  | 2     | 0     | 3  |   |   |   |   |   |   |                                                                                                                                                                                                                                                                                                                                                                                                                                                                                                                                                                    |  |    |     |       |    |   |    |    |    |    |   |   |     |    |    |   |   |    |       |    |   |   |   |   |    |   |   |   |   |   |   |   |    |   |   |   |
| rf                            | 0                                                                                                                                                                                                         | 4                  | 0     | 2     | 2  |   |   |   |   |   |   |                                                                                                                                                                                                                                                                                                                                                                                                                                                                                                                                                                    |  |    |     |       |    |   |    |    |    |    |   |   |     |    |    |   |   |    |       |    |   |   |   |   |    |   |   |   |   |   |   |   |    |   |   |   |
| J                             | 0                                                                                                                                                                                                         | 12                 | 3     | 2     | 0  |   |   |   |   |   |   |                                                                                                                                                                                                                                                                                                                                                                                                                                                                                                                                                                    |  |    |     |       |    |   |    |    |    |    |   |   |     |    |    |   |   |    |       |    |   |   |   |   |    |   |   |   |   |   |   |   |    |   |   |   |
| R26 <sub>2</sub> <sup>9</sup> | <table border="1"> <thead> <tr> <th>DD</th> <th>CSA</th> <th>isoCS</th> <th>rf</th> <th>J</th> </tr> </thead> <tbody> <tr> <td>0</td> <td>2</td> <td>0</td> <td>0</td> <td>1</td> </tr> </tbody> </table> | DD                 | CSA   | isoCS | rf | J | 0 | 2 | 0 | 0 | 1 | <table border="1"> <thead> <tr> <th></th> <th>DD</th> <th>CSA</th> <th>isoCS</th> <th>rf</th> <th>J</th> </tr> </thead> <tbody> <tr> <th>DD</th> <td>16</td> <td>38</td> <td>6</td> <td>0</td> <td>0</td> </tr> <tr> <th>CSA</th> <td>38</td> <td>36</td> <td>4</td> <td>4</td> <td>12</td> </tr> <tr> <th>isoCS</th> <td>6</td> <td>4</td> <td>2</td> <td>0</td> <td>3</td> </tr> <tr> <th>rf</th> <td>0</td> <td>4</td> <td>0</td> <td>2</td> <td>2</td> </tr> <tr> <th>J</th> <td>0</td> <td>12</td> <td>3</td> <td>2</td> <td>0</td> </tr> </tbody> </table>   |  | DD | CSA | isoCS | rf | J | DD | 16 | 38 | 6  | 0 | 0 | CSA | 38 | 36 | 4 | 4 | 12 | isoCS | 6  | 4 | 2 | 0 | 3 | rf | 0 | 4 | 0 | 2 | 2 | J | 0 | 12 | 3 | 2 | 0 |
|                               | DD                                                                                                                                                                                                        | CSA                | isoCS | rf    | J  |   |   |   |   |   |   |                                                                                                                                                                                                                                                                                                                                                                                                                                                                                                                                                                    |  |    |     |       |    |   |    |    |    |    |   |   |     |    |    |   |   |    |       |    |   |   |   |   |    |   |   |   |   |   |   |   |    |   |   |   |
| 0                             | 2                                                                                                                                                                                                         | 0                  | 0     | 1     |    |   |   |   |   |   |   |                                                                                                                                                                                                                                                                                                                                                                                                                                                                                                                                                                    |  |    |     |       |    |   |    |    |    |    |   |   |     |    |    |   |   |    |       |    |   |   |   |   |    |   |   |   |   |   |   |   |    |   |   |   |
|                               | DD                                                                                                                                                                                                        | CSA                | isoCS | rf    | J  |   |   |   |   |   |   |                                                                                                                                                                                                                                                                                                                                                                                                                                                                                                                                                                    |  |    |     |       |    |   |    |    |    |    |   |   |     |    |    |   |   |    |       |    |   |   |   |   |    |   |   |   |   |   |   |   |    |   |   |   |
| DD                            | 16                                                                                                                                                                                                        | 38                 | 6     | 0     | 0  |   |   |   |   |   |   |                                                                                                                                                                                                                                                                                                                                                                                                                                                                                                                                                                    |  |    |     |       |    |   |    |    |    |    |   |   |     |    |    |   |   |    |       |    |   |   |   |   |    |   |   |   |   |   |   |   |    |   |   |   |
| CSA                           | 38                                                                                                                                                                                                        | 36                 | 4     | 4     | 12 |   |   |   |   |   |   |                                                                                                                                                                                                                                                                                                                                                                                                                                                                                                                                                                    |  |    |     |       |    |   |    |    |    |    |   |   |     |    |    |   |   |    |       |    |   |   |   |   |    |   |   |   |   |   |   |   |    |   |   |   |
| isoCS                         | 6                                                                                                                                                                                                         | 4                  | 2     | 0     | 3  |   |   |   |   |   |   |                                                                                                                                                                                                                                                                                                                                                                                                                                                                                                                                                                    |  |    |     |       |    |   |    |    |    |    |   |   |     |    |    |   |   |    |       |    |   |   |   |   |    |   |   |   |   |   |   |   |    |   |   |   |
| rf                            | 0                                                                                                                                                                                                         | 4                  | 0     | 2     | 2  |   |   |   |   |   |   |                                                                                                                                                                                                                                                                                                                                                                                                                                                                                                                                                                    |  |    |     |       |    |   |    |    |    |    |   |   |     |    |    |   |   |    |       |    |   |   |   |   |    |   |   |   |   |   |   |   |    |   |   |   |
| J                             | 0                                                                                                                                                                                                         | 12                 | 3     | 2     | 0  |   |   |   |   |   |   |                                                                                                                                                                                                                                                                                                                                                                                                                                                                                                                                                                    |  |    |     |       |    |   |    |    |    |    |   |   |     |    |    |   |   |    |       |    |   |   |   |   |    |   |   |   |   |   |   |   |    |   |   |   |

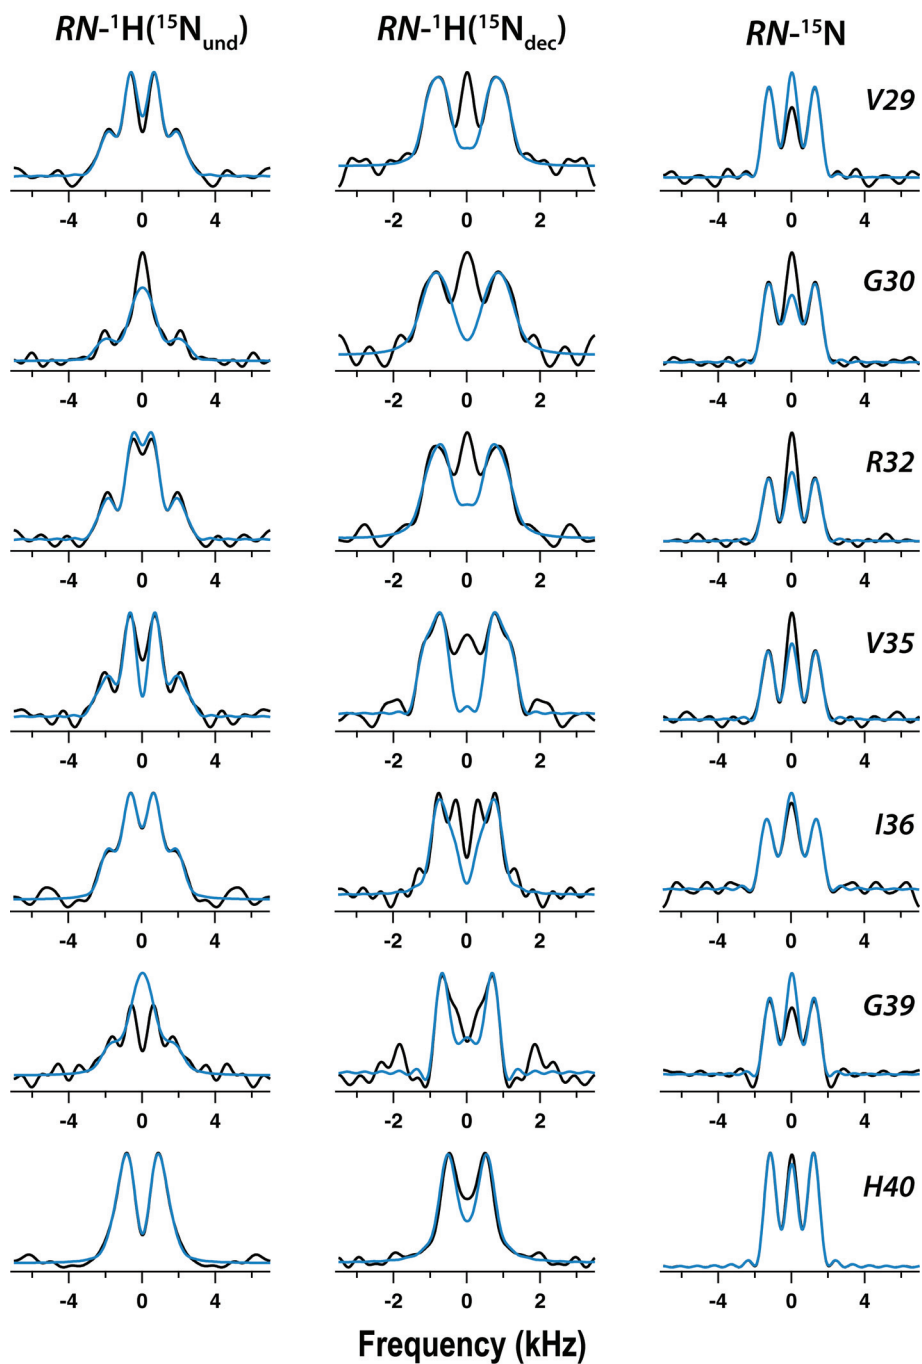

**Figure S1.** Experimental (black) and best-fit simulated with full Hamiltonian (blue)  $R12_1^4$ -symmetry based  $RN-^1H(^{15}N_{und})$ ,  $RN-^1H(^{15}N_{dec})$ , and  $RN-^{15}N$  lineshapes of residues V29 – H40 of U- $^{13}C$ ,  $^{15}N$ -CAP-Gly domain of mammalian dynactin.

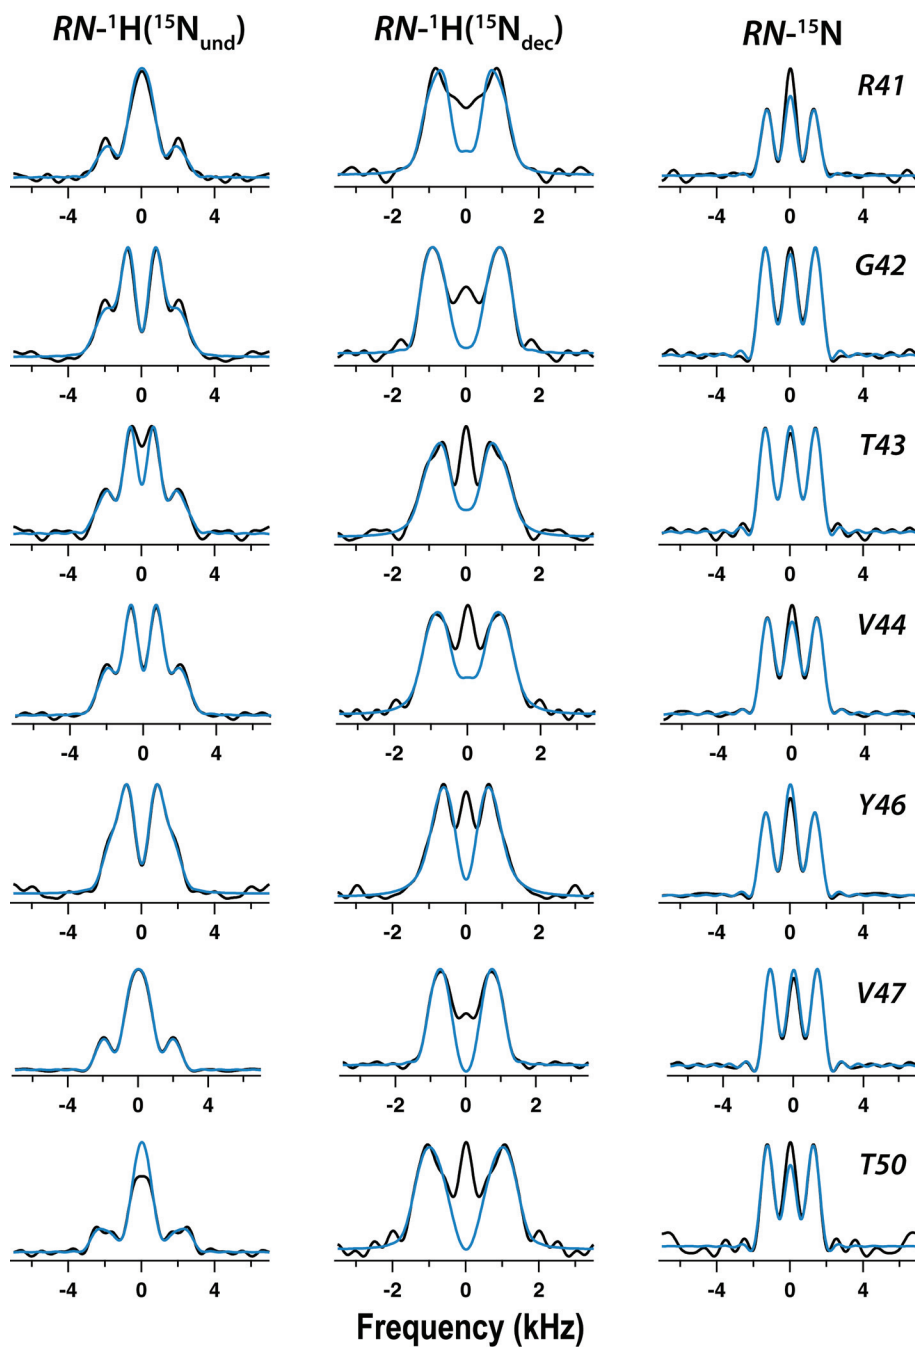

**Figure S2.** Experimental (black) and best-fit simulated with full Hamiltonian (blue)  $R12_1^4$ -symmetry based  $RN-^1H(^{15}N_{und})$ ,  $RN-^1H(^{15}N_{dec})$ , and  $RN-^{15}N$  lineshapes of residues R41 – T50 of  $U-^{13}C, ^{15}N$ -CAP-Gly domain of mammalian dynactin.

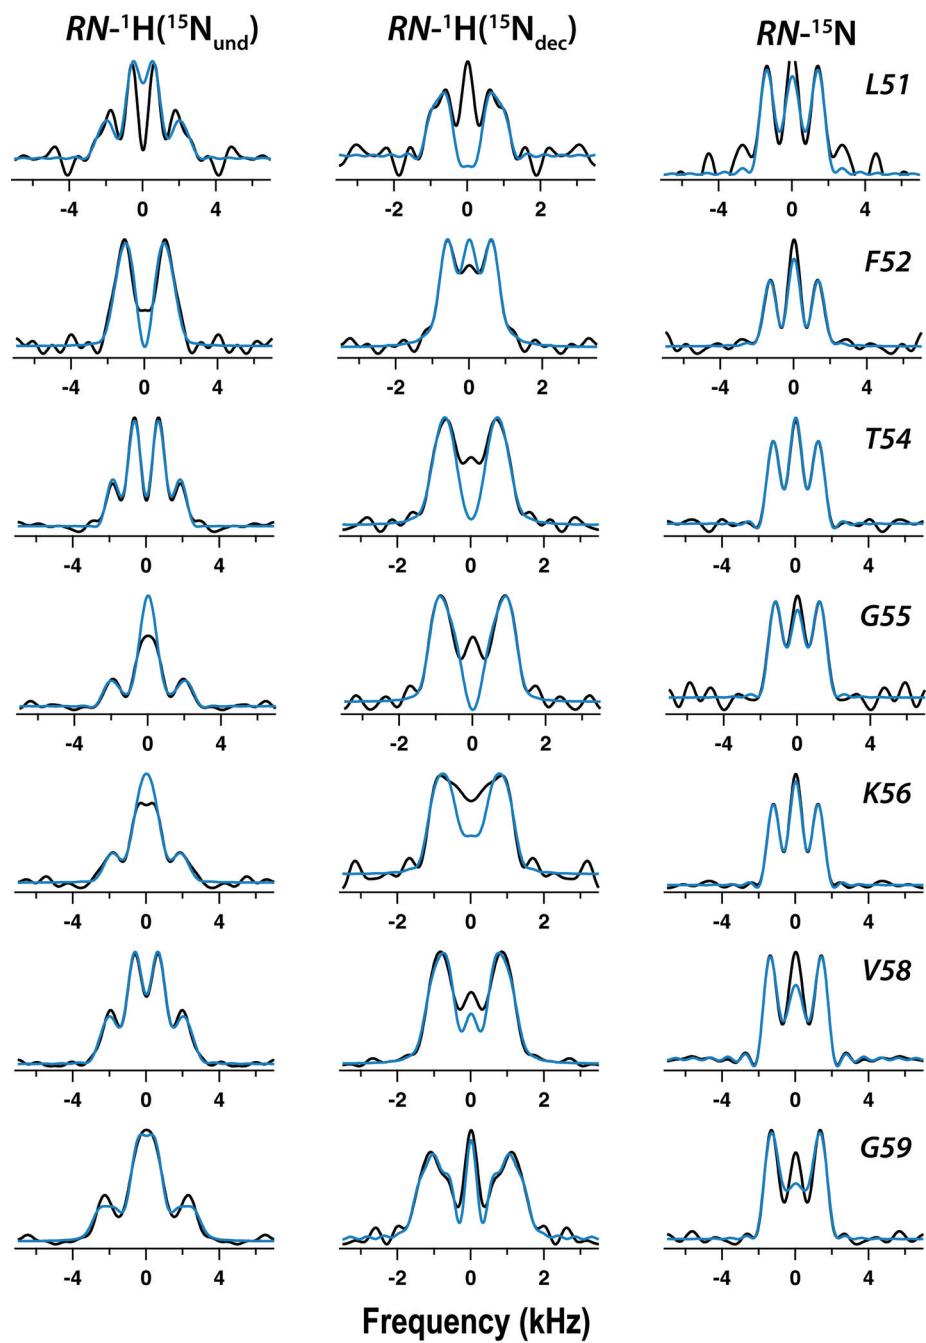

**Figure S3.** Experimental (black) and best-fit simulated with full Hamiltonian (blue)  $R12_1^4$ -symmetry based  $RN\text{-}^1\text{H}(^{15}\text{N}_{und})$ ,  $RN\text{-}^1\text{H}(^{15}\text{N}_{dec})$ , and  $RN\text{-}^{15}\text{N}$  lineshapes of residues L51 – G59 of  $\text{U-}^{13}\text{C}, ^{15}\text{N}$ -CAP-Gly domain of mammalian dynactin.



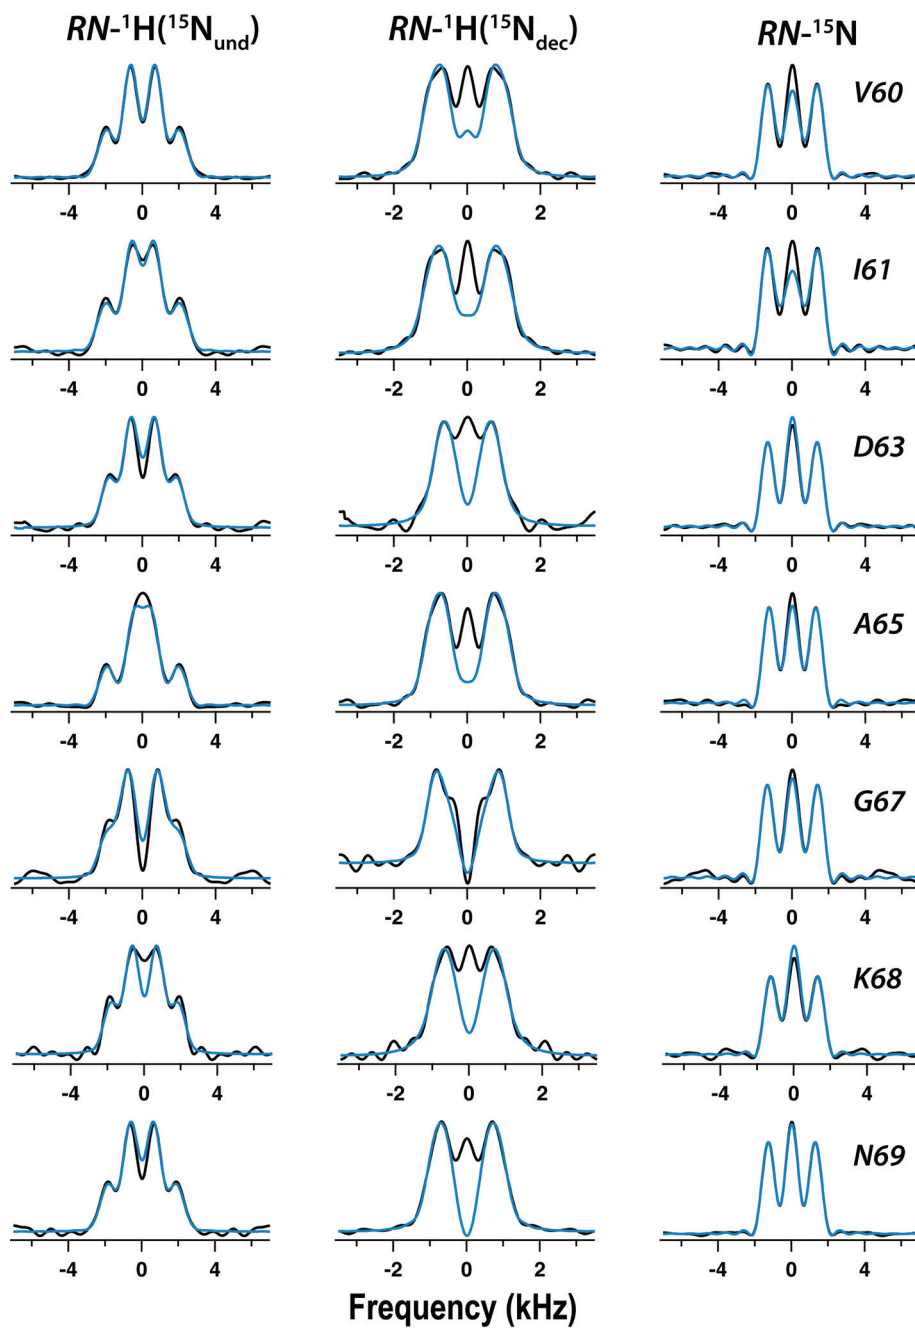

**Figure S4.** Experimental (black) and best-fit simulated with full Hamiltonian (blue)  $R12_1^4$ -symmetry based  $RN-^1H(^{15}N_{und})$ ,  $RN-^1H(^{15}N_{dec})$ , and  $RN-^{15}N$  lineshapes of residues V60 – N60 of  $U-^{13}C, ^{15}N$ -CAP-Gly domain of mammalian dynactin.

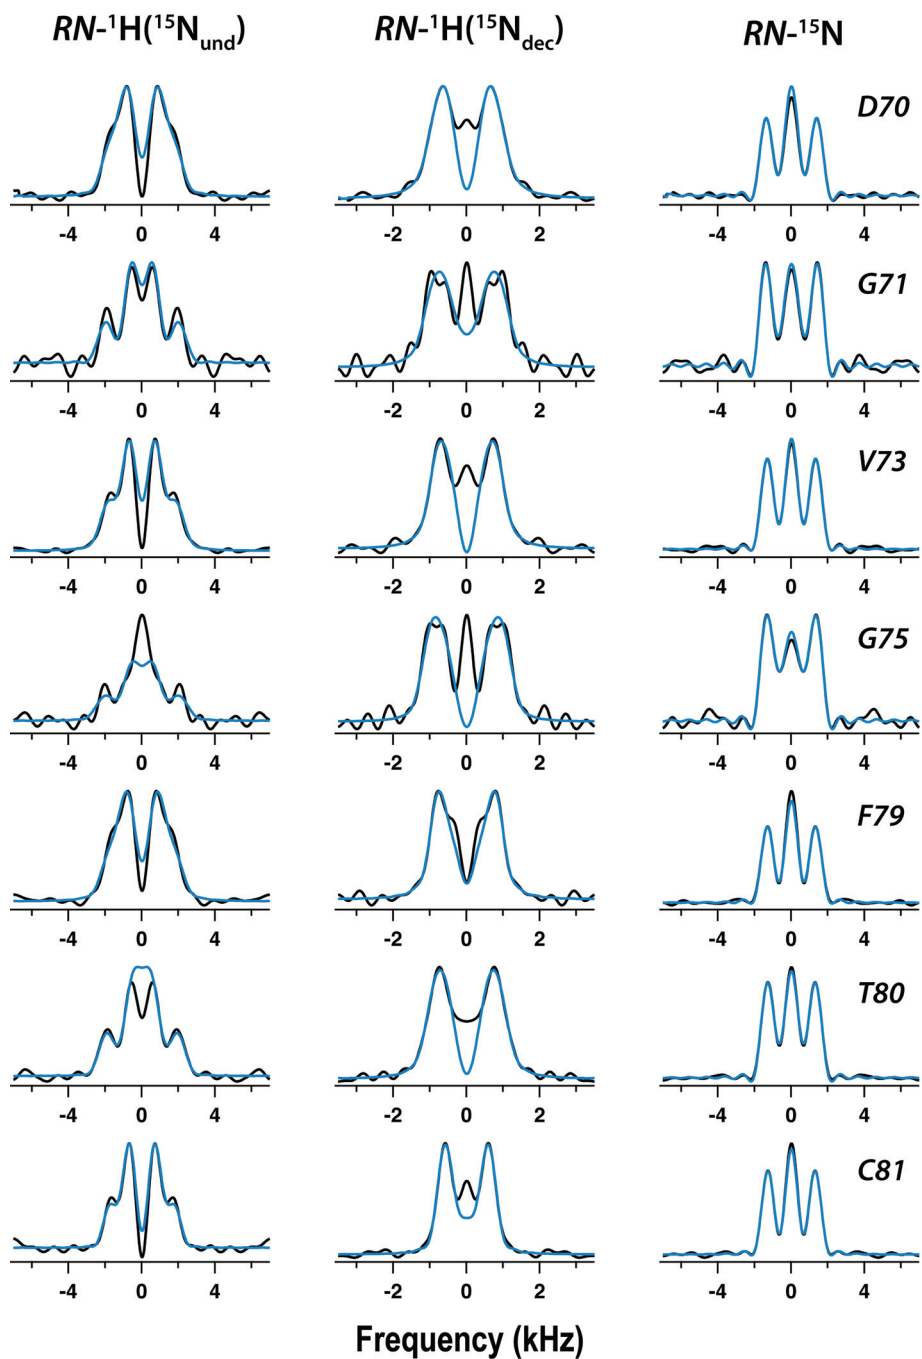

**Figure S5.** Experimental (black) and best-fit simulated with full Hamiltonian (blue)  $R12_1^4$ -symmetry based  $RN-^1H(^{15}N_{und})$ ,  $RN-^1H(^{15}N_{dec})$ , and  $RN-^{15}N$  lineshapes of residues D70 – C81 of  $U-^{13}C, ^{15}N$ -CAP-Gly domain of mammalian dynactin.

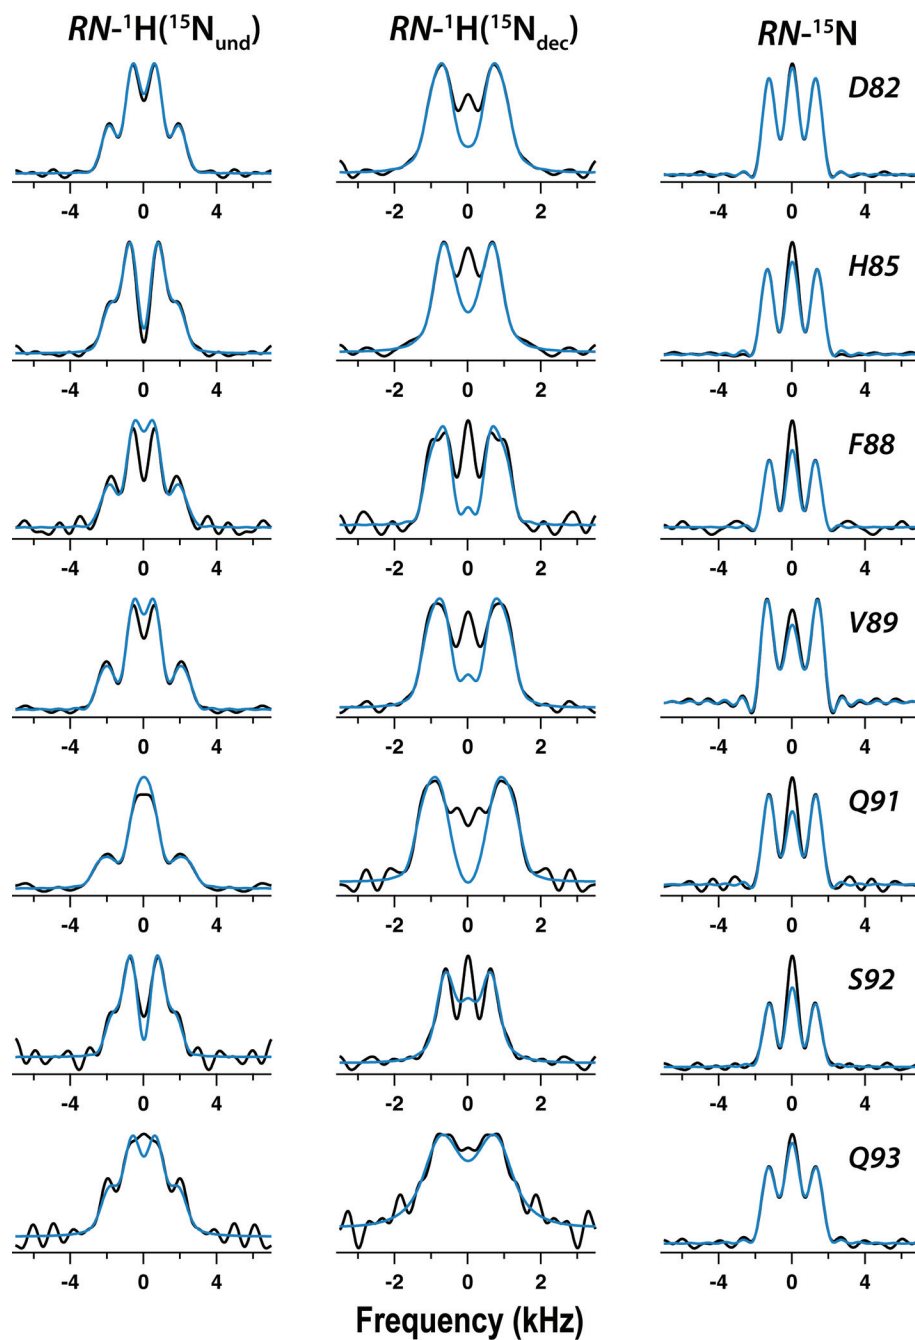

**Figure S6.** Experimental (black) and best-fit simulated with full Hamiltonian (blue)  $R12_1^4$ -symmetry based  $RN\text{-}^1\text{H}(^{15}\text{N}_{und})$ ,  $RN\text{-}^1\text{H}(^{15}\text{N}_{dec})$ , and  $RN\text{-}^{15}\text{N}$  lineshapes of residues D82 – Q93 of  $\text{U-}^{13}\text{C}, ^{15}\text{N}$ -CAP-Gly domain of mammalian dynactin.

## References

- (1) Rienstra, C. M.; Tucker-Kellogg, L.; Jaroniec, C. P.; Hohwy, M.; Reif, B.; McMahon, M. T.; Tidor, B.; Lozano-Perez, T.; Griffin, R. G. *Proc. Natl. Acad. Sci. USA* **2002**, *99*, 10260-10265.
- (2) Duncan, T. M. *A Compilation of Chemical Shift Anisotropies*; Farragut Press, Chicago, United States, **1990**.
- (3) Rienstra, C. M.; Hohwy, M.; Mueller, L. J.; Jaroniec, C. P.; Reif, B.; Griffin, R. G. *J. Am. Chem. Soc.* **2002**, *124*, 11908-11922.
